# Supplementary material for: Current Regulation and Initial Considerations for Successful Development and Commercialization of Microbiome Therapies
Source: Hindawi journal article supplement (doi:10.1155/2023/6657515), 2023-05-29

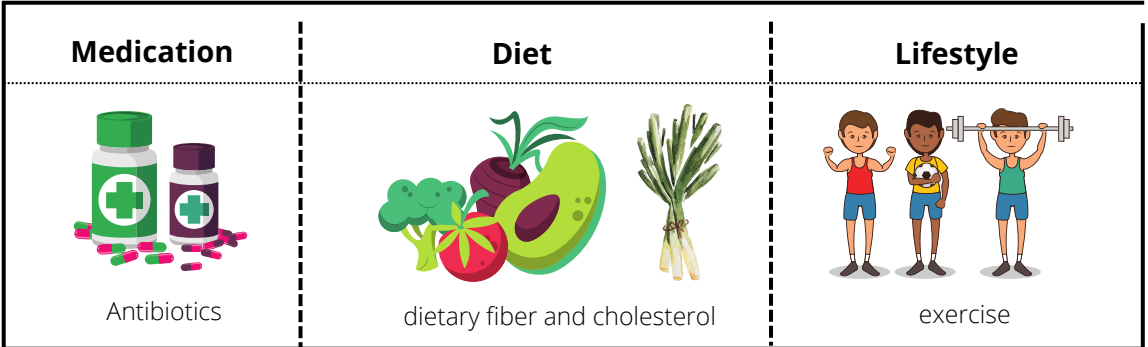

**Factors which influence gut microbe**

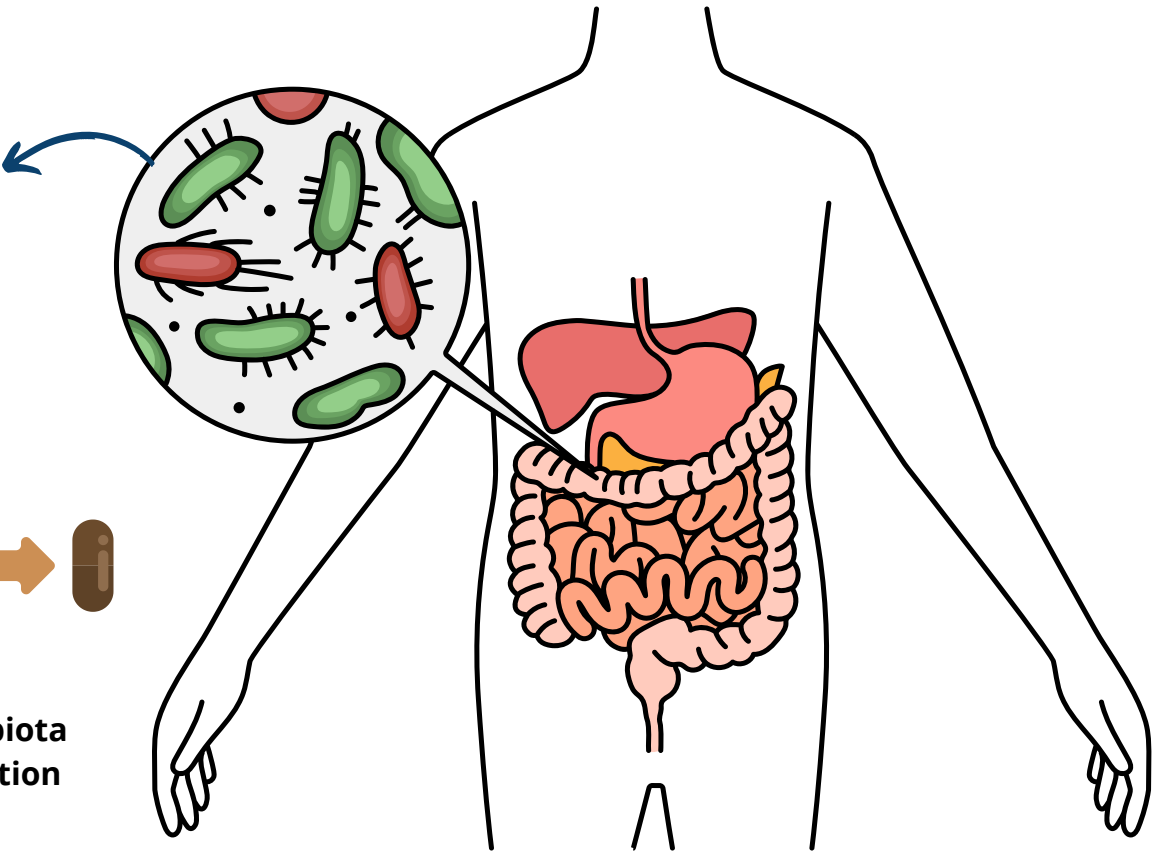

**Probiotics**

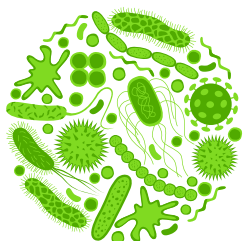

**Methods to restore gut microbiota**

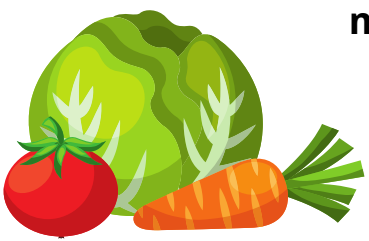

**Prebiotics**

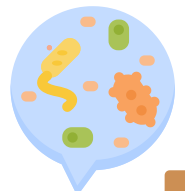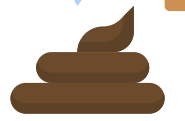

**Fecal microbiota transplantation**

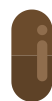

**Regulatory considerations for FMT**

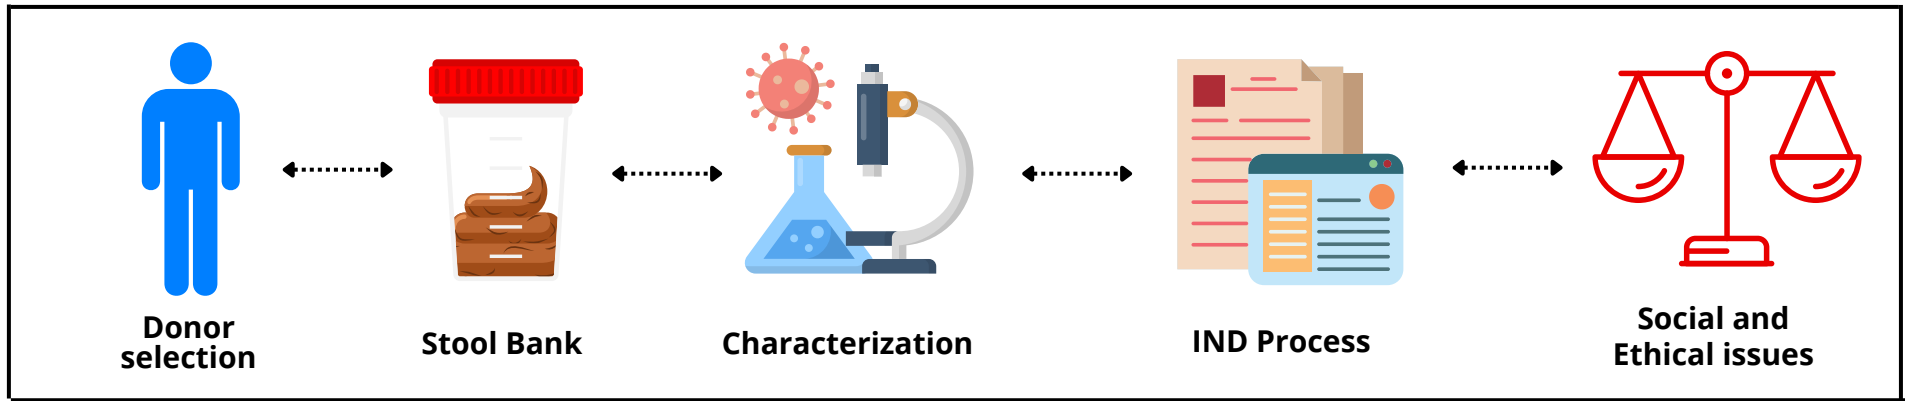

Supplement: f1 [file 6657515.f1.pdf]
